# Supplementary material for: Development and validation of NIR model using low-concentration calibration range: rapid analysis of Lonicera japonica solution in ethanol precipitation process
Source: Royal Society of Chemistry journal article supplement (doi:10.1039/c2ay05607k), 2012-01-01
Supplement: c2ay05607k.pdf [file c2ay05607k.pdf]

## Development and validation of NIR model using low-concentration calibration range: rapid analysis of *Lonicera japonica* solution in ethanol precipitation process

Zhisheng Wu<sup>a</sup>, Min Du<sup>a</sup>, Chenglin Sui<sup>a</sup>, Xinyuan Shi<sup>a\*</sup> and Yanjiang Qiao<sup>a,\*</sup>

<sup>a</sup> Received (in XXX, XXX) Xth XXXXXXXXX 20XX, Accepted Xth XXXXXXXXX 20XX

DOI: 10.1039/b000000x

### Supporting information

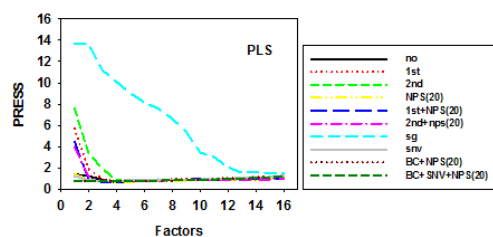

10 Fig.1 Effect of number of PLS latent factors on PRESS values for chlorogenic acid calibration model with different pre-processing treatments.
